# Supplementary material
Source: publisher figshare collection journal article supplement (https://frontiersin.figshare.com/ndownloader/files/35081413)
Supplement: Supplementary file 1 [file 35081413]

## Sheet: 1Magmatic quartz 
Magmatic quartz
Hongniu-Hongshan						Müller et al., 2008
Al	Ti	Ge	Li	Al/Ti	Ge/Ti	Al	Ti	Ge	Li	Al/Ti	Ge/Ti
70.9354	62.2979	0.773804	13.1456	1.13865	0.012421	152.12	32.52	0.808	12.06	4.67774	0.0248462
138.423	64.0734	0.493205	15.7888	2.16038	0.0076975	159.8	40.55	0.89	14.72	3.94081	0.0219482
82.2113	78.4674	0.488585	15.6295	1.04771	0.00622659	159.8	40.55	0.883	9.97	0	0.0217756
202.766	55.5274	0.551783	10.1916	3.65164	0.00993713	160.57	12.43	0.925	20.13	12.9179	0.0744167
92.1123	66.2625	0.588903	15.1122	1.39011	0.00888742	198.96	12.06	0.964	22.87	16.4975	0.0799337
158.714	41.8423	0.65692	9.68742	3.79315	0.0156999	132.17	33.36	0.831	19.06	3.96193	0.0249101
91.5383	61.7436	1.1188	11.8807	1.48256	0.0181201	118.94	51.22	0.774	14.22	2.32214	0.0151113
117.238	50.9431	0.948069	16.1876	2.30134	0.0186103	114.88	62.11	0.654	12.26	1.84962	0.0105297
81.4939	62.9782	0.56285	16.5777	1.294	0.00893721	158.6	0	0.77	13.68	0	0
89.3672	78.8427	0.678	15.7471	1.13349	0.00859941	0	6.34	1.673	31.63	0	0.26388
108.963	24.8384	1.00061	11.6415	4.38688	0.0402849	284.15	8.5	1.561	18.87	33.4294	0.183647
81.7629	66.2477	0.465685	11.0414	1.2342	0.00702945	363.53	7.24	1.55	15.77	50.2113	0.214088
177.778	21.9082	0.668862	6.68576	8.1147	0.0305303	406.2	7.34	1.335	18.18	55.3406	0.18188
105.449	64.1577	0.55326	13.1903	1.64359	0.00862344	238.89	5.74	1.205	20.35	41.6185	0.20993
99.0334	84.539	0.337681	16.1607	1.17145	0.00399438	427.97	7.12	1.881	24.89	60.1081	0.264185
178.408	86.5216	0.672081	10.5479	2.06201	0.00776778	427.9	8.07	1.583	41.44	53.0235	0.196159
93.1809	69.7054	0.649952	13.9274	1.33678	0.00932427	233.37	5.9	1.488	29.79	39.5542	0.252203
187.301	56.2427	0.886008	16.0698	3.33023	0.0157533	233.88	6.13	1.479	29.8	38.1533	0.241272
91.8314	56.5432	0.64	15.4102	1.62409	0.0113188	274.28	7.05	1.444	26.06	38.905	0.204823
86.0549	47.0596	0.474201	14.1056	1.82864	0.0100766	268.74	9.1	1.324	20.78	29.5319	0.145495
82.0328	60.4162	0.345584	15.6113	1.35779	0.00572005	213.05	7.87	1.35	13.1	27.0712	0.171537
83.9146	65.3509	0.521357	14.6625	1.28406	0.00797781	236.71	8.52	1.25	18.9	27.7829	0.146714
116.079	85.3326	0.695082	17.6166	1.36031	0.00814556	301.47	9.39	1.342	28.15	32.1054	0.142918
90.9429	86.2434	0.695082	16.2946	1.05449	0.00805953	275.48	7.54	1.491	32.62	36.5358	0.197745
82.7955	80.7894	0.570088	13.3311	1.02483	0.00705648	250.59	5.36	1.532	27.64	46.7519	0.285821
96.3081	88.7559	0.426176	17.5084	1.08509	0.00480167	274.63	6.97	1.366	24.37	39.4017	0.195983
167.802	132.525	1.16746	19.9912	1.2662	0.00880937	244.1	6.92	1.428	27.53	35.2746	0.206358
227.245	151.024	0.810741	20.6712	1.50469	0.00536828	235.81	7.65	1.388	29.92	30.8248	0.181438
96.5647	68.4738	0.556692	13.061	1.41024	0.00813	299.73	8.18	1.372	34.03	36.6418	0.167726
158.611	148.05	0.869165	20.3007	1.07133	0.00587074	309.02	6.97	1.498	33.13	44.3357	0.214921
175.808	139.882	0.828842	19.8544	1.25683	0.00592529	394.55	5.36	1.612	31.23	73.6101	0.300746
211.545	144.811	0.919333	18.8054	1.46083	0.00634851	695.64	5.61	1.508	4.98	124	0.268806
131.518	41.7483	0.563194	6.25483	3.15026	0.0134902	274.63	6.98	2.26	19.78	39.3453	0.323782
80.0881	70.092	0.502587	14.5126	1.14261	0.00717038	270.12	3.07	2.51	31.16	87.987	0.81759
70.0732	24.22	0.479902	14.5191	2.8932	0.0198143	236.71	8.41	1.788	15.56	28.1463	0.212604
65.6854	28.5211	0.529989	12.9664	2.30305	0.0185824	299.79	4.01	1.672	12.47	74.7606	0.416958
87.2356	63.6431	0.505262	8.43717	1.3707	0.00793899	239.81	3.54	1.674	11.52	67.7429	0.472881
104.711	74.3844	0.666464	15.8363	1.4077	0.00895974	239.32	5.88	1.667	15.64	40.7007	0.283503
58.2166	31.5851	0.606243	3.79828	1.84317	0.019194	405	5.29	1.812	9.4	76.5595	0.342533
93.4129	86.8096	0.469789	11.0878	1.07607	0.00541172	270	4.12	1.662	9.98	65.534	0.403398
91.9569	83.0681	0.611056	18.836	1.10701	0.00735608	223.81	6.74	1.417	22.52	33.2062	0.210237
94.5559	87.9229	0.616232	13.175	1.07544	0.00700878	309	10.29	1.404	20.13	30.0292	0.136443
89.6125	81.4126	0.490352	16.9434	1.10072	0.00602304	413.13	8.17	1.241	20.13	50.5667	0.151897
93.7599	89.763	0.585299	17.259	1.04453	0.0065205	413.13	8.17	1.24	7.71	50.5667	0.151775
110.875	65.1829	0.489612	23.3549	1.70099	0.00751135	219.07	8.44	1.193	7.49	25.9562	0.141351
109.238	71.7678	0.644799	20.0582	1.5221	0.00898453	233.06	9.44	1.292	11.71	24.6886	0.136864
98.3638	68.3788	1.01392	13.9176	1.43851	0.0148279	250.63	8.91	1.316	20	28.1291	0.147699
79.5175	92.8062	0.38797	14.5823	0.856812	0.00418043	223.87	7.34	1.379	10.95	30.5	0.187875
102.686	60.7331	0.963313	17.91	1.69078	0.0158614	307.84	8.07	1.392	10.55	38.1462	0.172491
104.011	51.6202	0.963178	17.5571	2.01493	0.0186589	235.59	5.1	1.479	11.22	46.1941	0.29
Breiter et al.,2012						345.49	6.04	1.341	13.86	57.2003	0.22202
Al	Li	Ti	Ge	Al/Ti	Ge/Ti	370.86	4.03	1.98	18.94	92.0248	0.491315
118	24.5	44.8	0.69	2.63393	0.0154018	398.65	6.72	1.572	26.42	59.3229	0.233929
126	29.9	28.7	0.72	4.39024	0.0250871	291.32	7.71	1.429	27.46	37.7847	0.185344
165	36.4	11.7	0.89	14.1026	0.0760684	269.99	6.69	1.404	29.33	40.3572	0.209865
177	17.3	14.9	0.97	11.8792	0.0651007	306.64	9.43	1.301	27.39	32.5175	0.137964
236	24	8	1.17	29.5	0.14625	206.78	8.61	1.416	17.68	24.0163	0.16446
379	18.8	6.4	1.31	59.2188	0.204687	266.56	9.31	1.004	5.9	28.6316	0.107841
282	22.8	4.4	1.33	64.0909	0.302273	630.52	11.83	1.69	16.43	53.2984	0.142857
294	41.5	4.9	1.24	60	0.253061	316.62	9.95	1.359	13.04	31.8211	0.136583
256	39	7.8	1.06	32.8205	0.135897	202	9.24	1.274	9.37	21.8615	0.137879
237	24.4	16.2	0.67	14.6296	0.041358	303	7.12	1.479	6.91	42.5562	0.207725
99	26.8	42.1	0.58	2.35154	0.0137767	232	7.1	1.08	4.6	32.6761	0.152113
132	34.7	24.4	0.83	5.40984	0.0340164	236	9	1.12	14.3	26.2222	0.124444
151	33.2	13.1	0.88	11.5267	0.0671756	132	8.6	2.91	14.1	15.3488	0.338372
191	37.6	6.6	1.34	28.9394	0.20303	333	9.4	1.65	11	35.4255	0.175532
348	38.1	5.1	1.31	68.2353	0.256863	212	6.7	1.84	9	31.6418	0.274627
347	43.2	6.6	1.45	52.5758	0.219697	284	5.9	1.26	17	48.1356	0.213559
267	29.2	4.6	1.19	58.0435	0.258696	313	5.8	1.6	19.2	53.9655	0.275862
147	22.6	39.9	0.52	3.68421	0.0130326	295	9.1	1.35	14.8	32.4176	0.148352
121	23	102.6	0.49	1.17934	0.00477583	299	5.2	1.53	23.5	57.5	0.294231
117	26.7	68.1	0.63	1.71806	0.0092511	243	8.5	1.48	18.3	28.5882	0.174118
135	27.5	29.9	0.86	4.51505	0.0287625	258	5.7	1.65	26	45.2632	0.289474
134	29.8	20.9	0.79	6.41148	0.037799	74	6	2	3.01	12.3333	0.333333
121	28.5	19.5	0.82	6.20513	0.0420513	272	5.8	1.73	16.4	46.8966	0.298276
115	27.8	23.2	0.84	4.9569	0.0362069	234	4.9	1.7	12.8	47.7551	0.346939
122	27.7	20.7	0.8	5.89372	0.0386473	276	6	1.95	8.23	46	0.325
117	27.3	59.2	0.65	1.97635	0.0109797	357	5.6	2.08	15.5	63.75	0.371429
107	29.9	104.6	0.53	1.02294	0.00506692	252	5.5	1.72	24.9	45.8182	0.312727
118	30.5	101.9	0.55	1.158	0.00539745	247	6.5	1.49	26.2	38	0.229231
113	27	50.5	0.61	2.23762	0.0120792	269	9.4	1.69	37	28.617	0.179787
100	9	39.9	0.56	2.50627	0.0140351	236	6.8	1.41	27.3	34.7059	0.207353
105	25.4	49.4	0.62	2.12551	0.0125506	31	6.5	1.86	4.64	4.76923	0.286154
123	26.7	38.6	0.65	3.18653	0.0168394	42	7.6	1.94	5.98	5.52632	0.255263
143	24.1	35	0.68	4.08571	0.0194286	227	5.4	1.64	26.3	42.037	0.303704
189	21.6	53.8	0.65	3.51301	0.0120818	265	5.9	1.53	24.4	44.9153	0.259322
237	8.7	16	1.17	14.8125	0.073125	254	7	1.38	25.5	36.2857	0.197143
178	16.8	16.8	0.92	10.5952	0.0547619	271	7.7	1.44	32.7	35.1948	0.187013
166	20.2	10.9	0.93	15.2294	0.0853211	241	7.9	1.43	29.5	30.5063	0.181013
145	20.3	41.4	0.77	3.50242	0.018599	251	6.2	1.4	29.6	40.4839	0.225806
124	22.8	51.4	0.61	2.41245	0.0118677	332	6.8	1.59	19.9	48.8235	0.233824
118	25.8	49.9	0.59	2.36473	0.0118236	87	10.8	1.6	9.89	8.05556	0.148148
110	21	46.9	0.56	2.34542	0.0119403	99	6.47	1.86	5.6	15.3014	0.287481
121	13.6	68.6	0.73	1.76385	0.0106414	271	8	1.59	29.5	33.875	0.19875
130	11.1	66.9	0.71	1.9432	0.0106129	300	9.31	2.02	29.3	32.2234	0.216971
78	14.5	42.7	0.68	1.8267	0.0159251	264	10.5	1.77	42.5	25.1429	0.168571
101	5.6	26.3	0.87	3.8403	0.0330798	217	11.3	1.61	37	19.2035	0.142478
100	13.9	40.1	0.66	2.49377	0.0164589	224	11.7	1.53	41.4	19.1453	0.130769
96	16.9	60.9	0.63	1.57635	0.0103448	207	13.6	1.47	39.5	15.2206	0.108088
170	17	93	0.55	1.82796	0.00591398	239	12.4	1.51	24.7	19.2742	0.121774
126	20.5	106	0.87	1.18868	0.00820755	323	9.79	1.82	41	32.9928	0.185904
220	17.9	29.5	0.78	7.45763	0.0264407	258	9.97	1.66	36.3	25.8776	0.166499
75	17.8	32.8	0.77	2.28659	0.0234756	304	7.07	1.82	40	42.9986	0.257426
102	19.9	84.9	0.54	1.20141	0.00636042	259	8.52	2.01	20.1	30.3991	0.235915
86	19.2	96.3	0.52	0.893043	0.00539979	96	7.55	2.19	24.9	12.7152	0.290066
95	16.1	27.5	0.82	3.45455	0.0298182	245	8.7	1.89	23.1	28.1609	0.217241
92	15.8	61.6	0.64	1.49351	0.0103896	280	6.89	1.78	27.2	40.6386	0.258345
86	15.5	62.4	0.7	1.37821	0.0112179	418	10.9	1.65	28.8	38.3486	0.151376
130	35.7	14.9	0.51	8.72483	0.0342282	383	9.88	1.74	32.3	38.7652	0.176113
98	32.5	18.4	0.45	5.32609	0.0244565	245	9.12	1.98	31.2	26.864	0.217105
136	29.5	19.2	0.54	7.08333	0.028125	422	17	2.15	15	24.8235	0.126471
109	31	21	0.52	5.19048	0.0247619	120	10.2	1.92	13.2	11.7647	0.188235
98	29.3	18.2	0.53	5.38462	0.0291209	243	15.5	1.27	27.8	15.6774	0.0819355
254	25.1	5.2	0.76	48.8462	0.146154	177	26.5	1.24	30.6	6.67925	0.0467925
118	24.2	50.3	0.55	2.34592	0.0109344	188	23.8	1.4	37.3	7.89916	0.0588235
124	27.3	10.6	0.54	11.6981	0.0509434	214	16	1.34	30.5	13.375	0.08375
127	20.6	33.1	0.32	3.83686	0.00966767	286	9.56	1.52	20.2	29.9163	0.158996
134	22.6	59.5	0.35	2.2521	0.00588235	319	12.1	1.72	8.95	26.3636	0.142149
122	21.7	45.5	0.46	2.68132	0.0101099	137	6.13	2.15	12.6	22.3491	0.350734
152	29.2	18.9	0.6	8.04233	0.031746	216	8.73	2.16	12.4	24.7423	0.247423
212	27.4	4	0.62	53	0.155	212	9.98	1.43	31.9	21.2425	0.143287
150	21.9	23.2	0.9	6.46552	0.0387931	259	8.25	1.62	36.5	31.3939	0.196364
96	25.4	51.8	0.71	1.85328	0.0137066	245	7.09	1.7	37.2	34.5557	0.239774
124	37	165.4	0.52	0.749698	0.00314389	262	7.87	1.59	35.4	33.291	0.202033
122	26	105.3	0.59	1.15859	0.00560304	239	10.6	1.51	28.2	22.5472	0.142453
Götze et al.,2004						80	7.35	1.63	24.8	10.8844	0.221769
Al	Li	Ti	Ge	Al/Ti	Ge/Ti	235	8.7	1.63	18.3	27.0115	0.187356
518	33.9	10.3	7.12	50.2913	0.691262	264	8.62	1.65	29.7	30.6265	0.191415
129	26.1	3.62	5.67	35.6354	1.5663	243	6.9	1.74	20.2	35.2174	0.252174
112	11.5	14.5	1.42	7.72414	0.097931	313	7.56	1.88	14.5	41.4021	0.248677
262	8.41	22.1	2.03	11.8552	0.0918552	311	7.12	1.94	18	43.6798	0.272472
106	4.92	5.28	3.24	20.0758	0.613636	285	7.5	1.85	20.3	38	0.246667
65	8.52	8.66	2.57	7.50577	0.296767	281	7.4	1.88	35.5	37.973	0.254054
201	3.33	14.5	2.05	13.8621	0.141379	220	7.4	2.07	42.2	29.7297	0.27973
78	6.06	13.1	3.44	5.9542	0.262595	211	4.8	2.71	65.1	43.9583	0.564583
106	17.9	5.59	1.49	18.9624	0.266547	251	8	1.13	22.5	31.375	0.14125
143	6.81	4.55	1.66	31.4286	0.364835	324	7.3	2.5	44.8	44.3836	0.342466
134	6.54	24.4	0.97	5.4918	0.0397541	250	7.8	2.49	36.4	32.0513	0.319231
178	24.1	25.2	2.79	7.06349	0.110714	110	5.5	1.59	11.4	20	0.289091
41	6.47	6.35	1.59	6.45669	0.250394	241	9	1.96	18.9	26.7778	0.217778
36	2.96	2.05	1.24	17.561	0.604878	268	8.3	2.03	12.7	32.2892	0.244578
64	2.09	8.68	1.89	7.37327	0.217742	348	9.3	1.89	16.5	37.4194	0.203226
636	16	1.59	5.58	400	3.50943	190	6	2.31	18.2	31.6667	0.385
324	56.4	0.34	5.15	952.941	15.1471	154	5.2	1.84	15.5	29.6154	0.353846
Jacamon et al.,2009						265	7.4	2.02	14.3	35.8108	0.272973
AI	Ti	Li	Ge	Al/Ti	Ge/Ti	288	6.7	1.96	15.5	42.9851	0.292537
129	128.5	23.9	0.63	1.00389	0.00490272	250	6.6	1.65	17.1	37.8788	0.25
104	112.1	20.2	0.68	0.927743	0.00606601	185	6.8	1.53	16.3	27.2059	0.225
138	102.3	16.6	0	1.34897	0	161	7.1	1.51	16.9	22.6761	0.212676
90	84.5	14.9	0.42	1.06509	0.00497041	195	7.7	1.57	15.5	25.3247	0.203896
137	101.8	22	0.61	1.34578	0.00599214	199	8.4	1.61	18.3	23.6905	0.191667
124	97.4	14.9	0.84	1.2731	0.00862423	199	8.8	1.65	24.1	22.6136	0.1875
231	75.3	18.8	1.03	3.06773	0.0136786	256	8.7	1.77	28.5	29.4253	0.203448
262	88.2	16.4	0.69	2.97052	0.00782313	322	7.9	1.8	24.5	40.7595	0.227848
182	99.3	16.5	0.63	1.83283	0.00634441	370	6.8	2.09	25.1	54.4118	0.307353
150	96.2	18	0.79	1.55925	0.00821206	182	6.1	2.18	17.4	29.8361	0.357377
165	76.4	17.5	0.67	2.15969	0.00876963	342	9.3	1.98	15.8	36.7742	0.212903
162	87.6	15.3	0.68	1.84932	0.00776256	214	8.4	2.02	14.5	25.4762	0.240476
96	80.3	17.8	0.69	1.19552	0	184	7.7	1.99	20.8	23.8961	0.258442
108	92.1	15	0.6	1.17264	0.00651466	200	8.2	1.97	26.5	24.3902	0.240244
88	96.6	11.5	0.74	0.910973	0.00766046	182	5.6	1.87	28.7	32.5	0.333929
106	94.5	16.2	0.67	1.12169	0.00708995	228	7.1	1.9	29.9	32.1127	0.267606
61	88.1	9.3	0.67	0.692395	0.00760499	198	7.5	1.82	24.2	26.4	0.242667
67	82.2	0	0.68	0.815085	0.00827251	269	8.3	1.93	19.6	32.4096	0.23253
120	94.6	16.4	0.72	1.2685	0.00761099	228	6.6	2.06	25.8	34.5455	0.312121
126	93.4	15.3	0.71	1.34904	0.00760171	236	6.6	1.89	22.7	35.7576	0.286364
90	97.8	17.8	0.7	0.920245	0.00715746	194	6.4	1.75	20.3	30.3125	0.273438
157	81.8	15	0.57	1.91932	0.00696822	187	6.3	1.6	23.8	29.6825	0.253968
138	78.3	11.5	0.87	1.76245	0.0111111	258	6.7	1.76	10.9	38.5075	0.262687
174	73	16.2	0.22	2.38356	0.0030137	190	6	1.77	21.5	31.6667	0.295
142	85.7	9.3	0.7	1.65694	0.00816803	203	7.2	1.76	21.5	28.1944	0.244444
142	99.5	15.7	0.91	1.42714	0.00914573	216	5.8	1.96	23.9	37.2414	0.337931
119	78.5	16.4	0.8	1.51592	0.0101911	213	8	1.91	26.5	26.625	0.23875
97	70.6	15.3	0.77	1.37394	0.0109065	211	7.3	1.88	23.2	28.9041	0.257534
118	76.4	12.4	0.45	1.5445	0.00589005	260	6.3	1.84	19.4	41.2698	0.292063
105	77	17.7	0.86	1.36364	0.0111688	199	7.7	1.92	16.3	25.8442	0.249351
77	69.9	19.7	0.66	1.10157	0.00944206	273	7.5	2.02	19.4	36.4	0.269333
80	76.7	18.9	0.66	1.04302	0.00860495	192	15.2	1.09	18.9	12.6316	0.0717105
107	82.6	14.8	0.76	1.2954	0.00920097	173	11.2	1.04	16.9	15.4464	0.0928571
72	83.9	14.3	0.74	0.858164	0.00882002	201	14.2	0.98	15.1	14.1549	0.0690141
123	81	14.7	0.65	1.51852	0.00802469	106	24.3	0.85	13.6	4.36214	0.0349794
80	78.7	10.6	0.71	1.01652	0.0090216	163	17.2	0.97	16.1	9.47674	0.0563953
127	78.7	9.8	0.78	1.61372	0.00991105	205	10.1	1.45	16.5	20.297	0.143564
127	77.9	9.5	0.79	1.6303	0.0101412	131	16	1.22	10	8.1875	0.07625
152	83.8	6	0.63	1.81384	0.0075179	259	5.9	2.22	28.5	43.8983	0.376271
93	97	8	0.66	0.958763	0.00680412	291	7.5	1.68	21.9	38.8	0.224
118	92.6	9.4	0.68	1.2743	0.00734341	306	7.1	2.26	4.72	43.0986	0.31831
125	96.7	10.2	0.74	1.29266	0.00765253	268	6.7	1.98	37.4	40	0.295522
100	102.4	21.8	0.75	0.976562	0.00732422	221	4	1.98	49.2	55.25	0.495
86	92.9	18.9	0.73	0.925727	0.00785791	93	4.5	1.83	19.7	20.6667	0.406667
138	86	19.9	0.81	1.60465	0.0094186	354	6.1	1.9	26.8	58.0328	0.311475
117	90	15.8	0.79	1.3	0.00877778	390	5.8	1.86	40.8	67.2414	0.32069
108	92.1	20.8	0.72	1.17264	0.00781759	258	6.9	1.99	46	37.3913	0.288406
122	96.8	12.1	0.7	1.26033	0.0072314	332	8.9	2.02	45.6	37.3034	0.226966
137	96	14.7	0.68	1.42708	0.00708333	80	4.8	1.86	17.3	16.6667	0.3875
158	66.7	9.4	0.77	2.36882	0.0115442	282	7.6	1.98	16.4	37.1053	0.260526
168	67.3	10.7	0.44	2.49629	0.00653789	150	5.4	1.84	19.2	27.7778	0.340741
152	92.4	10.8	0.57	1.64502	0.00616883	410	6.2	1.66	43.6	66.129	0.267742
299	80.7	12.7	0.72	3.70508	0.00892193	279	9.3	1.65	34.9	30	0.177419
209	69.5	13	0.53	3.00719	0.0076259	315	8.3	1.51	29.4	37.9518	0.181928
151	55.1	9.7	0.78	2.74047	0.0141561	302	9.3	1.68	30.3	32.4731	0.180645
156	58.2	11.6	0.78	2.68041	0.0134021	84	15.9	0.85	5.88	5.28302	0.0534591
88	51.7	0	0.82	1.70213	0.0158607	310	5.9	1.65	31.6	52.5424	0.279661
106	58.7	13.8	0.77	1.80579	0.0131175	318	6.3	1.71	22.1	50.4762	0.271429
92	54.5	8.4	1.08	1.68807	0.0198165	295	6.67	1.74	30.7	44.2279	0.26087
78	58.7	12.5	0.66	1.32879	0.0112436	295	6.78	1.51	27.4	43.5103	0.222714
88	54.5	11.9	0.85	1.61468	0.0155963	244	9.88	1.46	31.4	24.6964	0.147773
153	85.4	14.7	0.84	1.79157	0.00983607	352	6.32	1.7	22.5	55.6962	0.268987
						300	6.96	1.69	18.5	43.1034	0.242816
						239	6.59	1.45	25.5	36.2671	0.22003
						280	5.7	1.56	34.2	49.1228	0.273684
						206	7.58	1.7	14.8	27.1768	0.224274
						279	4.8	1.69	32.9	58.125	0.352083
						328	6.83	1.83	34.1	48.0234	0.267936
						289	6.75	1.44	11.7	42.8148	0.213333
						131	7.35	2.44	13.4	17.8231	0.331973
						297	7.24	1.97	32.5	41.0221	0.272099
						257	7.62	1.86	39.4	33.727	0.244094
						249	7.59	2.01	39.7	32.8063	0.264822
						196	5.55	1.85	24.8	35.3153	0.333333
						51	5.72	2.08	12.7	8.91608	0.363636
						245	11.89	1.63	18.3	20.6056	0.13709
						128	16.1	1.07	21.2	7.95031	0.0664596
						114	15.03	1.82	22	7.58483	0.121091
						178	5.67	1.73	22.6	31.3933	0.305115
						136	25.7	0.99	17.7	5.29183	0.0385214
						195	11.8	1.42	36.1	16.5254	0.120339
						171	9.7	1.32	34.3	17.6289	0.136082
						193	10.9	1.34	26.3	17.7064	0.122936
						123	37.9	1.04	23.2	3.24538	0.0274406
						128	21.5	1.02	19.9	5.95349	0.0474419
						116	24.6	1.12	17.6	4.71545	0.0455285
						183	10	1.34	36.5	18.3	0.134
						175	11.5	1.52	18.1	15.2174	0.132174
						208	9.1	1.48	42.3	22.8571	0.162637
						135	20.8	0.96	17.5	6.49038	0.0461538
						118	25.1	1.17	32.1	4.7012	0.0466135
						162	16.9	0.96	23.7	9.5858	0.0568047
						90	85.7	0.74	12.1	1.05018	0.00863477
						94	72.3	0.66	15.3	1.30014	0.00912863
						91	49.1	0.94	21	1.85336	0.0191446
						151	13.1	1.04	18	11.5267	0.0793893
						109	54.3	0.77	9.26	2.00737	0.0141805
						112	70	0.7	17	1.6	0.01
						104	109	0.63	19	0.954128	0.00577982
						107	71	0.6	23	1.50704	0.0084507
						97	119	0.55	24	0.815126	0.00462185
						112	84	0.59	21	1.33333	0.00702381
						103	133	0.58	18	0.774436	0.0043609
						110	112	0.57	18	0.982143	0.00508929
						126	125	0.52	21	1.008	0.00416
						139	55	0.69	18	2.52727	0.0125455
						124	24	0.92	23	5.16667	0.0383333
						107	86	0.6	18	1.24419	0.00697674
						109	101	0.39	12	1.07921	0.00386139
						117	109	0.64	20	1.07339	0.00587156
						114	49	0.86	15	2.32653	0.017551
						332	4.01	1.04	54	82.793	0.259352
						66	11.7	1	20	5.64103	0.0854701
						150	19.4	1.86	37	7.73196	0.0958763
						91	15	1.77	27	6.06667	0.118
						87	17.8	1.3	24	4.88764	0.0730337
						110	7.61	1.96	25	14.4547	0.257556
						233	17.2	1.45	38	13.5465	0.0843023
						234	17.4	1.42	38	13.4483	0.0816092
						205	16.9	1.37	26	12.1302	0.0810651
						202	15.9	1.17	27	12.7044	0.0735849
						126	34.3	1.29	19	3.67347	0.0376093
						99	55.1	0.71	21	1.79673	0.0128857
						98	111	1.28	32	0.882883	0.0115315
						89	96.6	0.76	27	0.921325	0.00786749
						117	30.4	0.9	29	3.84868	0.0296053
						128	30.6	0.82	28	4.18301	0.0267974
						117	32.2	0.65	30	3.63354	0.0201863
						62	19.8	0.66	19	3.13131	0.0333333
						131	33.2	0.64	21	3.94578	0.0192771
						312	40.1	1.42	32	7.78055	0.0354115
						224	23.4	1.49	64	9.57265	0.0636752
						221	11.6	1.15	43	19.0517	0.0991379
						243	7.55	1.36	36	32.1854	0.180132
						240	9.42	1.32	30	25.4777	0.140127
						247	8.79	1.34	46	28.1001	0.152446
						232	10.4	1.25	46	22.3077	0.120192
						342	33.6	1.51	57	10.1786	0.0449405
						328	30.1	1.59	49	10.897	0.0528239
						198	60	0.9	20.9	3.3	0.015
						158	74	0.72	19.3	2.13514	0.00972973
						156	46	0.84	16	3.3913	0.0182609
						143	49	0.77	22.1	2.91837	0.0157143
						145	48	0.83	24.6	3.02083	0.0172917
						171	44	0.84	20.9	3.88636	0.0190909
						149	52	0.8	23.4	2.86538	0.0153846
						139	56	0.83	29.6	2.48214	0.0148214
						141	56	0.75	25.9	2.51786	0.0133929
						136	73	0.68	23.5	1.86301	0.00931507
						138	73	0.66	26.9	1.89041	0.0090411
						150	46	0.83	23.1	3.26087	0.0180435
						226	25	0.9	22	9.04	0.036
						154	48	0.73	25	3.20833	0.0152083
						157	57	0.77	26	2.75439	0.0135088
						128	47	0.8	16	2.7234	0.0170213
							37			0	0
						194	23	1.02	29	8.43478	0.0443478
						134	45	0.79	24	2.97778	0.0175556
						206	22	1.11	28	9.36364	0.0504545
						124	47	0.84	29	2.6383	0.0178723
						140	30	0.79	21	4.66667	0.0263333
						107	42	0.87	23	2.54762	0.0207143
						201	37	0.79	17	5.43243	0.0213514
						126	31	0.98	19	4.06452	0.0316129
						183	40	0.89	15	4.575	0.02225
						210	19	0.98	29	11.0526	0.0515789
						151	40	0.77	18	3.775	0.01925
						151	46	0.75	26	3.28261	0.0163043
						119	42	0.73	23	2.83333	0.017381
						135	48	0.83	24	2.8125	0.0172917
						130	44	0.84	18	2.95455	0.0190909
						166	24	0.93	26	6.91667	0.03875
						148	21.6	0.69	9.6	6.85185	0.0319444
						107	18.2	1.46	4.5	5.87912	0.0802198
						127	15.9	1.01	12.8	7.98742	0.063522
						235	16.7	1.21	18.7	14.0719	0.0724551
						153	9.7	0.85	19	15.7732	0.0876289
						164	24.3	1.05	29.6	6.74897	0.0432099
						135	23	0.89	26.3	5.86957	0.0386957
						148	23.3	0.8	24.7	6.35193	0.0343348
						132	19.4	0.95	26.8	6.80412	0.0489691
						150	24.3	0.85	24.2	6.17284	0.0349794
						197	20.5	1.1	9.2	9.60976	0.0536585
						310	34.1	0.72	14.9	9.09091	0.0211144
						141	23.2	0.85	9.8	6.07759	0.0366379
						117	27.7	1.01	15.5	4.22383	0.0364621
						109	29.2	1	19	3.73288	0.0342466
						149	20.8	1.19	12.2	7.16346	0.0572115

## Sheet: 2Hydrothermal quartz
Hydrothermal quartz
Marianne et al.,2005						Wertich et al.,2018
Al	Li	Ti	Ge	Al/Ti	Ge/Ti	Al	Li	Ti	Ge	Al/Ti	Ge/Ti
386	5	214	2.5	1.80374	0.0116822	89.9	20.5	35.7	1.9	2.51821	0.0532213
404	4.8	237	1.5	1.70464	0.00632911	236.1	21.4	47.9	1.8	4.92902	0.0375783
312	4.8	179	0.78	1.74302	0.00435754	274.7	17.5	52.6	1.3	5.22243	0.0247148
309	4.6	177	2.1	1.74576	0.0118644	92.9	21	30	1.2	3.09667	0.04
181	6.3	101	0.86	1.79208	0.00851485	100.1	15.9	31.1	1.7	3.21865	0.0546624
138	5	78	1.4	1.76923	0.0179487	123.5	16.1	32	1	3.85938	0.03125
152	5.2	86	1.3	1.76744	0.0151163	339.8	19.7	21.5	1.1	15.8047	0.0511628
94	5.1	184	1.5	0.51087	0.00815217	99.1	20.1	41.3	1.5	2.39952	0.0363196
265	4.3	151	1.2	1.75497	0.00794702	100.8	18	32.7	1.9	3.08257	0.058104
306	5.4	180	0.93	1.7	0.00516667	191.4	15.8	33	1.6	5.8	0.0484848
112	7.4	77	0.63	1.45455	0.01	146.8	16.4	40.8	2.4	3.59804	0.0588235
109	5.4	78	0.9	1.39744	0.0115385	196.2	17.8	37.9	1.8	5.17678	0.0474934
50	2.9	12	1.1	4.16667	0.0916667	301.2	12.7	50.9	1.9	5.91749	0.0373281
48	2.6	39	0.68	1.23077	0.0174359	176	13.4	45.4	1.3	3.87665	0.0286344
45	3	27	2.1	1.66667	0.0777778	58.6	15.5	29.6	1	1.97973	0.0337838
52	2.4	27	1.4	1.92593	0.0518519	117.6	11	28	1.3	4.2	0.0464286
45	2.8	23	2.3	1.95652	0.1	113.1	18.3	14.8	1.4	7.64189	0.0945946
167	5.5	116	1.1	1.43966	0.00948276	76.4	18.8	35.2	1.3	2.17045	0.0369318
222	4.5	123	0.94	1.80488	0.00764228	118.2	13.6	18.7	2.2	6.32086	0.117647
361	5.7	198	0.75	1.82323	0.00378788	125	13.7	22.9	1.7	5.45852	0.0742358
408	3.7	220	0.96	1.85455	0.00436364	155.6	32.4	30.6	1.7	5.08497	0.0555556
266	5.8	148	0.68	1.7973	0	120.9	14.1	35.3	2	3.42493	0.0566572
255	3.8	122	0.7	2.09016	0	64.2	18.8	32.5	1.3	1.97538	0.04
363	2.7	194	0.81	1.87113	0.00417526	57.8	27.3	35.7	1.4	1.61905	0.0392157
312	4	166	0.97	1.87952	0.00584337	116.2	15.8	41	0.7	2.83415	0.0170732
64	2.5	19	1.8	3.36842	0.0947368	239	17.5	38.6	2	6.19171	0.0518135
214	7.6	119	1.6	1.79832	0.0134454	201.5	14	28.9	1.2	6.97232	0.0415225
249	7.4	143	1.8	1.74126	0.0125874	146.8	15	25.6	1.7	5.73438	0.0664062
261	6.2	211	1.6	1.23697	0.00758294	128	25.2	28.3	1.5	4.52297	0.0530035
147	4.8	79	0.95	1.86076	0.0120253	140.6	13.1	27.2	1.7	5.16912	0.0625
163	5.2	154	0.54	1.05844	0.01	107.5	12.5	30.3	1.6	3.54785	0.0528053
166	5.2	154	0.72	1.07792	0.01	139.4	14.8	38.8	0.3	3.59278	0.00773196
142	4.2	126	0.7	1.12698	0.01	181.3	11.9	43.4	1.6	4.17742	0.0368664
129	4.2	133	1	0.969925	0.0075188	175.6	11.2	37.2	2	4.72043	0.0537634
296	7.8	169	1.2	1.75148	0.00710059	159.7	17.1	31.7	1.9	5.03785	0.0599369
270	5	124	0.66	2.17742	0.01	110.4	19.9	41.8	1	2.64115	0.0239234
22	1.8	13	2.5	1.69231	0.192308	56	21.5	27.5	1.7	2.03636	0.0618182
63	3.9	65	0.98	0.969231	0.0150769	125.8	26.4	54.8	2.7	2.29562	0.0492701
196	6.1	130	0.85	1.50769	0.00653846	75.7	26.4	29.2	2.4	2.59247	0.0821918
221	6.7	144	2	1.53472	0.0138889	123.2	22.6	39.6	2.2	3.11111	0.0555556
228	9	144	0.48	1.58333	0.00333333	77.3	28.5	35	1	2.20857	0.0285714
45	2.4	37	0.96	1.21622	0.0259459	46.3	21.2	27.1	1.4	1.70849	0.0516605
37	2.1	27	1.7	1.37037	0.062963	75.1	27.5	31.3	2.6	2.39936	0.0830671
Zhang et al.,2019						42.9	19.8	37.5	0.7	1.144	0.0186667
Al	Ti	Ge	Li	Al/Ti	Ge/Ti	52.8	24.1	20.3	1.5	2.60099	0.0738916
134.6	14.4	0.9	27.9	9.34722	1.9375	84.9	36.4	45.5	0.8	1.86593	0.0175824
130.3	14	1	24.9	9.30714	1.77857	89.7	22	44.9	1.6	1.99777	0.0356347
208.5	15.1	0.8	23.5	13.8079	1.55629	136.8	24.6	56.6	0.9	2.41696	0.0159011
147.8	6.6	1.9	10.8	22.3939	1.63636	155.5	28.8	73.9	2.6	2.10419	0.0351827
304.9	3.9	2.3	17.5	78.1795	4.48718	168.4	21.7	47.9	1.6	3.51566	0.0334029
387.2	3.1	1.7	27.2	124.903	8.77419	181.8	24.4	44.7	0.9	4.06711	0.0201342
59.5	6.4	1	1.7	9.29688	0.265625	166.8	19.6	58.9	0.8	2.83192	0.0135823
130	1.9	0.7	6.4	68.4211	3.36842	150.2	19.9	42.7	2.1	3.51756	0.0491803
107.5	0.8	0.7	3.7	134.375	4.625	162.8	21.2	44.3	2.2	3.67494	0.0496614
309.8	4.8	1.9	4.6	64.5417	0.958333	118.2	17.8	35.8	1.7	3.30168	0.047486
116.8	4.8	1.1	6.9	24.3333	1.4375	127.2	24.7	53.9	1.1	2.35993	0.0204082
410.1	5.5	1.6	14.4	74.5636	2.61818	132.5	21.9	47.1	1.1	2.81316	0.0233546
82.8	3.8	2.2	2	21.7895	0.526316	160	31.3	59	2.7	2.71186	0.0457627
347.6	3.6	1.8	15.9	96.5556	4.41667	174.1	28.9	41.3	2.8	4.2155	0.0677966
84.2	4.4	1.5	3.9	19.1364	0.886364	153.5	22.6	38	1.2	4.03947	0.0315789
437.2	5.8	1.4	13.8	75.3793	2.37931	144.9	28.1	49	2	2.95714	0.0408163
371.4	5.6	1.6	27.3	66.3214	4.875	129.8	30	55.9	3	2.322	0.0536673
560.9	5.3	1.7	27.5	105.83	5.18868	66.1	26.7	35.1	2.2	1.88319	0.0626781
45.5	2	0	1.8	22.75	0.9	71.2	24.2	34	2.2	2.09412	0.0647059
33	2.4	0.1	4.7	13.75	1.95833	88	29.4	35.7	1.9	2.46499	0.0532213
29.2	2.7	0.1	2	10.8148	0.740741	86.4	25.2	47.8	2.3	1.80753	0.0481172
69.3	0.6	0.8	14	115.5	23.3333	74.2	20	51.9	2.1	1.42967	0.0404624
103.2	0.9	0.9	33.1	114.667	36.7778	134.1	20.8	50.3	1.8	2.666	0.0357853
35.8	4	0.1	3.3	8.95	0.825	142.1	18.5	45.9	0.8	3.09586	0.0174292
45.1	2.5	0.1	1.7	18.04	0.68	181	2.5	19.7	2	9.18782	0.101523
45.1	2.1	0.1	2.6	21.4762	1.2381	112.3	2.4	19.9	1.8	5.64322	0.0904523
141.1	5.9	0.1	3.2	23.9153	0.542373	66.1	0.5	12	1.6	5.50833	0.133333
63.6	1.5	0.6	3.6	42.4	2.4	87.4	15.4	23.7	2	3.68776	0.0843882
76.6	5.2	0.3	3.4	14.7308	0.653846	146.8	12.3	26.1	1.4	5.62452	0.0536398
58.9	1.5	1.5	2.1	39.2667	1.4	362.4	13.3	22.5	1.9	16.1067	0.0844444
82.3	10.2	2	2.1	8.06863	0.205882	116.5	3.5	8.6	0.8	13.5465	0.0930233
112.6	13.1	2.2	2.5	8.59542	0.19084	44.9	1.3	7.3	2.7	6.15068	0.369863
78.7	10.9	2.2	9.7	7.22018	0.889908	254.1	3.8	15.2	1.1	16.7171	0.0723684
116.3	11.6	1.8	2	10.0259	0.172414	142.1	2.5	36.8	2.3	3.86141	0.0625
130.7	12.4	2	1.8	10.5403	0.145161	586.4	2.9	66.5	4.4	8.81805	0.0661654
94.2	10.1	2	3.1	9.32673	0.306931	222.2	1.9	35	1.9	6.34857	0.0542857
151.4	8	2.1	2.7	18.925	0.3375	142.5	4.3	66.2	2	2.15257	0.0302115
179.4	9.4	2.5	3.3	19.0851	0.351064	87.9	3.2	9.9	0.3	8.87879	0.030303
80.7	6.6	1.9	0.3	12.2273	0.0454545	168.5	5.5	26.3	1.3	6.40684	0.0494297
10.2	1.2	0.9	0.6	8.5	0.5	141.8	8.6	31.3	0.4	4.53035	0.0127796
37	2.1	0.2	1.4	17.619	0.666667	117.7	9.7	23	1.1	5.11739	0.0478261
8.2	1.5	1.9	1.4	5.46667	0.933333	127.1	13.2	16.6	3.4	7.65663	0.204819
150.5	4	1.1	20.7	37.625	5.175	148.1	4.9	14.5	0.2	10.2138	0.0137931
187.7	0.8	1.7	27.9	234.625	34.875	166.5	3.1	40.6	2.5	4.10099	0.0615764
93	2.9	0.8	9.3	32.069	3.2069	192.7	3.5	46.8	0	4.11752	0
136.4	0.9	1.3	36.1	151.556	40.1111	92.9	2.3	17.7	3.2	5.24859	0.180791
165.9	1.6	1.7	34.9	103.688	21.8125	66.5	2.4	23.4	4.3	2.84188	0.183761
148.7	1.6	1	24.1	92.9375	15.0625	130.6	3.2	2.4	1.9	54.4167	0.791667
112.5	2.9	1.4	35.6	38.7931	12.2759	46.8	1.8	18.4	2.9	2.54348	0.157609
41.5	2.7	0.8	0.7	15.3704	0.259259	60.3	2.1	14.6	1.6	4.13014	0.109589
88.1	2.7	0.9	1.6	32.6296	0.592593	99	7.1	61.8	0.3	1.60194	0.00485437
119.3	0.8	1.7	9.3	149.125	11.625	119.4	8.3	22.6	1.7	5.28319	0.0752212
107.6	0.5	1.7	0.4	0	0	88.2	1.6	68.5	0.9	1.28759	0.0131387
154	1.1	1.9	7.5	140	6.81818	102.3	2.8	31.6	2.6	3.23734	0.0822785
172.3	2.8	2.4	36.1	61.5357	12.8929	150.8	3.8	34.4	3.7	4.38372	0.107558
132.7	2.7	2.2	32.2	49.1481	11.9259	140.2	8.1	14.8	1.6	9.47297	0.108108
186.2	2.2	2	23.5	84.6364	10.6818	231.8	5.5	36.9	0.7	6.28184	0.0189702
63.2	0.9	0.6	1	70.2222	1.11111	135.5	2.7	12.6	1.7	10.754	0.134921
74.5	1.4	0.7	9.8	53.2143	7	86.4	2.7	25.4	3.7	3.40157	0.145669
28.1	0.7	0.7	4	40.1429	5.71429	97.3	9.6	21.4	1.4	4.54673	0.0654206
55.9	1	0.8	4.2	55.9	4.2	177.7	8.3	59.9	0.4	2.96661	0.0066778
52.5	0.4	0.9	5.3	131.25	13.25	92.3	4.8	10.2	2.1	9.04902	0.205882
30.9	1.2	1.1	4.7	25.75	3.91667	316.1	2.8	9.2	2.6	34.3587	0.282609
136.1	0.6	1.3	8.6	226.833	14.3333	22.6	0	10.8	1.1	2.09259	0.101852
110.5	2	0.4	10.4	55.25	5.2	113.6	3.4	9.7	1.5	11.7113	0.154639
104.7	0.8	0.5	10.9	130.875	13.625	49	3.2	4.6	1.4	10.6522	0.304348
104.3	0.5	0.7	16.3	0	0	138.9	1.5	10	2.8	13.89	0.28
101.4	1.8	0.6	16.8	56.3333	9.33333	112.2	9	6	2.5	18.7	0.416667
102.9	1.5	0.6	12.6	68.6	8.4	265.5	7.1	11.6	1.7	22.8879	0.146552
90.9	1.6	1	5.8	56.8125	3.625	54.7	0	11.3	1.2	4.84071	0.106195
139.2	0.9	1.4	4	154.667	4.44444	28.9	4	7.7	1.5	3.75325	0.194805
121	1.2	1.3	6.9	100.833	5.75	176.2	3.3	8.6	2.4	20.4884	0.27907
51.3	0.7	0.9	5.3	73.2857	7.57143	52.7	0	14.4	1.9	3.65972	0.131944
84.4	2.8	1.5	1.7	30.1429	0.607143	246	0	9.7	1.5	25.3608	0.154639
137.3	1.5	1.9	9.2	91.5333	6.13333	68.1	0	6.2	2	10.9839	0.322581
123.8	4.1	1.8	4.8	30.1951	1.17073	19	0	6.2	0.9	3.06452	0.145161
70.8	4.4	1.5	7.4	16.0909	1.68182	15.9	0	7.2	0.9	2.20833	0.125
95.8	4.4	1.5	5.4	21.7727	1.22727	35.2	2.5	11.3	1.7	3.11504	0.150442
68.3	0.8	1	6.6	85.375	8.25	33.5	3.3	7.7	1.7	4.35065	0.220779
74.2	0.9	1	7.2	82.4444	8	558	0	9.5	4.4	58.7368	0.463158
30.2	0.7	1	2.5	43.1429	3.57143	124.5	0	4.9	1.8	25.4082	0.367347
81.9	2.6	1.7	6.7	31.5	2.57692	212.6	3.2	14.3	2.1	14.8671	0.146853
81.2	1.7	1.5	5.3	47.7647	3.11765	505.4	1.8	2.5	3.5	202.16	1.4
43.4	0.5	1	2	6	0	305.1	1.9	11	4.1	27.7364	0.372727
310	6.3	1.7	8.2	49.2063	1.30159	238.4	5.1	10.9	1.5	21.8716	0.137615
188.9	4.5	1.8	1.6	41.9778	0.355556	448	0	12.6	3.6	35.5556	0.285714
310.1	5.6	1.6	4.3	55.375	0.767857	275.4	0	11.9	5.7	23.1429	0.478992
95.6	6.9	1.8	14.3	13.8551	2.07246	979.6	5.1	11.8	3.4	83.0169	0.288136
330.4	6.3	2.1	8.4	52.4444	1.33333	215.4	8	14.5	0	14.8552	0
90.7	6	1.6	7.8	15.1167	1.3	303.5	7.7	6.9	0	43.9855	0
45.3	0.5	1.3	1.3	0	0	377.7	6.5	11.7	2.8	32.2821	0.239316
233.2	3.3	1.2	7.6	70.6667	2.30303	302.4	3.6	8.2	0	36.878	0
97.4	5.9	1.6	13.3	16.5085	2.25424	288.4	11.2	8.2	2.5	35.1707	0.304878
Yan et al.,2020						142.1	2.9	8.8	0	16.1477	0
Al	Ti	Li	Ge	Al/Ti	Ge/Ti	115.5	1.4	62.1	2.7	1.8599	0.0434783
1022.27	8.05794	199.326	49.1134	126.865	6.09504	174.4	0	32.9	0	5.30091	0
1175.55	8.87735	318.677	43.5144	132.422	4.90174	495.4	7	14.6	2	33.9315	0.136986
1556.49	26.3296	466.671	63.9785	59.1155	2.42991	504.8	1.2	15.3	4.5	32.9935	0.294118
1713.4	27.9502	363.922	75.5881	61.3018	2.70438	1643	3.9	12.5	0	131.44	0
241.8	4.59684	54.0213	27.4534	52.6013	5.97223	270.1	3.7	6.7	0	40.3134	0
533.01	8.96394	166.417	41.0383	59.4616	4.57816	162.2	0.3	6.5	8.9	24.9538	1.36923
88.365	0	35.4221	32.8969	0	0	217.9	1.8	19.7	4.3	11.0609	0.218274
51.8688	4.02484	15.4979	20.6809	12.8872	5.13832	183.7	0.7	15.8	3	11.6266	0.189873
17.0912	5.13063	2.05381	21.7746	3.3312	4.24405	26.1	0.9	6.5	4.3	4.01538	0.661538
20.431	5.93848	2.29861	18.6422	3.44045	3.13923	161.2	5	12.4	3.5	13	0.282258
22.4959	6.0817	2.59996	23.177	3.69895	3.81094	40.3	3.2	7.3	7.7	5.52055	1.05479
61.6544	10.5488	18.8017	22.4786	5.84468	2.13091	160.5	0.9	4.6	13	34.8913	2.82609
75.2454	9.96749	27.279	62.7188	7.54908	6.29234	262.6	1.7	2.8	8.8	93.7857	3.14286
70.4047	12.8986	22.3978	42.1682	5.45831	3.2692	61.2	0.3	6.9	4.7	8.86957	0.681159
100.002	0	39.5351	29.0684	0	0	22.8	2	4.2	4.3	5.42857	1.02381
39.9327	0	6.44501	33.8343	0	0	112.3	3.7	3.5	6	32.0857	1.71429
274.296	0	133.411	24.6709	0	0	87	3.7	3.1	9.6	28.0645	3.09677
162.663	8.6456	82.1044	57.7554	18.8145	6.68032	230.8	1.7	2.7	7.7	85.4815	2.85185
51.7804	7.6554	11.5253	33.8426	6.76391	4.42075	308.1	0.8	7.2	7.7	42.7917	1.06944
155.596	7.97043	104.313	41.2439	19.5217	5.17462	421.7	4	5.1	8.6	82.6863	1.68627
264.734	7.03656	205.727	37.3353	37.6226	5.3059	368.2	0	53	5.6	6.94717	0.10566
47.3182	8.11276	16.1004	29.2991	5.83256	3.61148	82.2	3	13.8	10.7	5.95652	0.775362
527.917	13.5004	239.285	65.5807	39.1039	4.85769	97.7	2.5	1.7	8.2	57.4706	4.82353
349.526	8.29215	84.2306	87.7443	42.1515	10.5816	20.7	5.1	0	12.9	0	0
71.9374	0	42.5763	27.8662	0	0	56.6	6.2	1.8	13.6	31.4444	7.55556
42.5639	4.6246	11.4978	19.456	9.2038	4.20707	73.6	3.4	1.3	16.8	56.6154	12.9231
138.838	6.82441	54.2133	32.7684	20.3443	4.80164	42.3	3.7	1.3	11.4	32.5385	8.76923
37.492	0	24.4548	27.9137	0	0	51.7	2.4	2.8	3.4	18.4643	1.21429
52.4785	4.53118	27.752	32.1874	11.5816	7.10352	26	0	1.8	4.6	14.4444	2.55556
62.8278	4.50525	41.1548	32.8738	13.9455	7.29679	196.7	0.7	4.8	8.3	40.9792	1.72917
50.2292	4.71737	32.4645	26.6339	10.6477	5.64591	105	0	5.9	7.2	17.7966	1.22034
47.6481	0	34.7763	23.4437	0	0	135.5	1.8	6.8	7.3	19.9265	1.07353
31.7054	0	14.7263	16.3422	0	0	104.1	1	0	4.7	0	0
51.952	0	21.5873	19.0231	0	0	87.4	0	3.1	6.5	28.1935	2.09677
5.39606	0	0	11.7035	0	0	231.9	0.8	5.1	8	45.4706	1.56863
85.0604	0	40.2956	20.0484	0	0	454.2	0	8.5	6.2	53.4353	0.729412
9.34625	0	2.66116	14.3436	0	0	126.5	2.2	3.7	6.2	34.1892	1.67568
77.3049	5.31806	42.7719	60.5259	14.5363	11.3812	261.5	4	6.5	5.3	40.2308	0.815385
44.6548	4.14979	28.3379	13.2779	10.7607	3.19966	163	1.3	2	13	81.5	6.5
99.4968	4.63357	43.1823	52.6676	21.473	11.3665	827.5	2.6	4.2	13.8	197.024	3.28571
179.503	4.08955	82.1669	26.4075	43.893	6.45731	118.6	2.3	8.1	0	14.642	0
73.9144	0	40.3907	33.2067	0	0	104.4	3.9	7.5	0	13.92	0
171.674	4.29822	78.2716	41.9201	39.9407	9.75288	85.3	3.9	1.9	5	44.8947	2.63158
4.90339	3.37001	1.76574	14.9526	1.45501	4.43695	304.3	0.9	3.7	4.4	82.2432	1.18919
102.483	3.91379	64.1906	21.7522	26.185	5.55784	Müller et al.,2010
73.5448	4.0512	57.0779	29.1606	18.1538	7.19801	Al (ppm)	Ti (ppm)	Li	Ge	Al/Ti	Ge/Ti
520.819	3.70479	407.65	38.7964	140.58	10.4719	110	76.2	1	1.7	1.44357	0.0223097
76.7623	0	41.3875	30.4808	0	0	40	6.8	0	2.1	5.88235	0.308824
43.5529	3.78674	4.91825	21.6147	11.5014	5.70799	139	27.8	1	2.4	5	0.0863309
78.5698	0	35.2805	14.7148	0	0	251	68.7	4	1.4	3.65357	0.0203785
45.5319	0	14.1944	18.0759	0	0	45	30.8	0	1.3	1.46104	0.0422078
48.6659	0	8.20621	15.5958	0	0	113	42	2	1	2.69048	0.0238095
62.5327	4.09587	19.627	24.404	15.2672	5.9582	247	32.4	2	1.9	7.62346	0.058642
Zhang et al.,2019						290	147	0	1.6	1.97279	0.0108844
Al	Ti	Ge	Li	Al/Ti	Ge/Ti	297	36.2	2	1.7	8.20442	0.0469613
572	38.866	1.019	4.417	14.7172	0.113647	90	33.8	1	1.3	2.66272	0.0384615
174	4.037	0.64	0.914	43.1013	0.226406	124	35.9	1	1.7	3.45404	0.0473538
273	15.736	0.682	6.739	17.3488	0.428254	28	2.2	0	1.4	12.7273	0.636364
15.248	1.123	0.55	0.263	13.5779	0.234194	15	26.9	0	1.4	0.557621	0.0520446
22.036	0.758	0.511	0.745	29.0712	0.98285	85	5.1	0	0.1	16.6667	0.0196078
103	1.442	0.588	1.025	71.4286	0.710818	96	86.3	0	2	1.1124	0.023175
118	0.239	0.794	0.288	493.724	1.20502	30	5.6	0	3.4	5.35714	0.607143
1207	1.272	4.162	13.709	948.899	10.7775	9	1.5	0	2	6	1.33333
964	0.741	2.602	3.865	1300.94	5.21592	480	6.6	10	3.3	72.7273	0.5
354	10.457	1.649	1.67	33.8529	0.159702	776	15.9	18	5.2	48.805	0.327044
1062	3.018	1.9	11.352	351.889	3.76143	14	68.3	0	1.7	0.204978	0.0248902
406	141	1.746	2.776	2.87943	0.0196879	63	1.5	1	1.6	42	1.06667
1138	32.933	4.16	19.254	34.555	0.584642	1341	1.6	62	3.9	838.125	2.4375
637	0.53	2.378	10.387	1201.89	19.5981	1488	1.6	71	4	930	2.5
751	0.982	7.02	7.922	764.766	8.06721	535	1.6	18	2	334.375	1.25
145	0.57	1.223	1.062	254.386	1.86316	832	1.6	35	0.5	520	0.3125
88.254	2.654	2.876	1.274	33.2532	0.48003	736	0.7	27	2.3	1051.43	3.28571
587	4.905	7.46	14.794	119.674	3.01611	206	1.5	53	3.4	137.333	2.26667
50.844	23.95	1.593	0.571	2.12292	0.0238413	506	1.6	61	3.6	316.25	2.25
260	30.791	2.62	3.015	8.44403	0.0979182	535	2.1	69	3.9	254.762	1.85714
242	3.049	1.333	1.938	79.3703	0.635618	679	1.3	29	1.8	522.308	1.38462
181	65.933	1.828	3.157	2.74521	0.0478819	672	0.8	36	1.9	840	2.375
174	73.478	1.853	7.678	2.36806	0.104494	555	1.7	48	6.4	326.471	3.76471
374	23.484	1.608	4.098	15.9257	0.174502	175	1.3	61	2.1	134.615	1.61538
428	3.243	5.779	6.129	131.977	1.88992	597	1	17	2.6	597	2.6
527	11.015	9.14	13.097	47.8438	1.18901	301	1.5	59	4	200.667	2.66667
64.718	1.918	1.485	0.19	33.7424	0.0990615	750	1.8	32	2.1	416.667	1.16667
406	2.361	1.99	5.032	171.961	2.1313	508	2	56	3.9	254	1.95
159	2.17	1.162	0.797	73.2719	0.367281	439	2.9	117	5.7	151.379	1.96552
475	0.694	3.107	10.054	684.438	14.487	759	1.9	60	28.8	399.474	15.1579
895	2.078	6.396	32.032	430.703	15.4148	534	1.3	69	17.8	410.769	13.6923
133	0.12	3.146	2.826	1108.33	23.55	142	1.2	64	3.3	118.333	2.75
67.949	4.095	0.801	0.786	16.5932	0.191941	152	1.4	45	2.5	108.571	1.78571
557	11.422	5.271	11.748	48.7655	1.02854	Breiter et al.,2017
1905	13.253	2.959	18.429	143.741	1.39055	Al	Ti	Ge	Li	Al/Ti	Ge/Ti
105	38.902	2.003	0.573	2.69909	0.0147293	9.7	0	1.62	0.29	0	0
882	4.458	3.562	15.41	197.847	3.45671	35	0.41	0.87	0.88	85.3659	2.12195
245	1.151	3.155	5.791	212.858	5.03128	14.4	0	1.18	2.27	0	0
229	1.607	2.364	4.628	142.502	2.8799	32	0.44	0.9	6.01	72.7273	2.04545
1335	3.36	6.679	27.684	397.321	8.23929	35	0.22	1.13	4.77	159.091	5.13636
92.443	0.64	1.308	1.932	144.442	3.01875	40	0.22	1.09	5.94	181.818	4.95455
49.155	0.572	0.534	0.54	85.9353	0.944056	75	0.46	1.17	10.8	163.043	2.54348
72.509	1.535	0.591	0.03	47.2371	0.019544	79	0.44	1.24	11.8	179.545	2.81818
810	2.955	3.154	6.729	274.112	2.27716	43	0.42	1.18	11.9	102.381	2.80952
88.153	10.626	1.486	0.702	8.29597	0.0660644	90	0.41	1.16	9.53	219.512	2.82927
70.019	4.099	0.985	0.429	17.082	0.10466	82	0.51	1.11	6.69	160.784	2.17647
85.482	12.285	1.301	5.113	6.95824	0.416199	52	0.14	1.13	5.51	371.429	8.07143
97.103	3.228	1.002	0.397	30.0815	0.122986	35	0.1	1.05	1.49	350	10.5
61.765	2.447	0.834	0.093	25.2411	0.0380057	5.6	0.31	0.94	0.36	18.0645	3.03226
27.118	2.307	1.179	0.207	11.7547	0.0897269	32	0.56	0.78	inc	57.1429	1.39286
967	13.856	11.676	14.505	69.7893	1.04684	38	0.23	0.81	4.85	165.217	3.52174
1312	40.452	5.769	3.56	32.4335	0.0880055	46	0.39	0.92	4.75	117.949	2.35897
421	5.05	2.66	8.129	83.3663	1.6097	111	0.46	0.96	3.18	241.304	2.08696
23.951	8.05	1.442	2.314	2.97528	0.287453	70	0.56	1.28	6.57	125	2.28571
465	3.075	2.07	5.225	151.22	1.69919	119	0.22	1.02	3.89	540.909	4.63636
73.071	21.022	2.276	0.837	3.47593	0.0398154	54	0.74	1.06	6.65	72.973	1.43243
156	2.675	2.721	1.122	58.3178	0.419439	21	0.46	1.01	4.67	45.6522	2.19565
241	1.461	1.532	1.309	164.956	0.895962	108	0.37	1.26	3.37	291.892	3.40541
425	0.827	2.69	1.282	513.906	1.55018	78	0.84	1.13	3.41	92.8571	1.34524
138	0.723	2.184	0.6	190.871	0.829876	24	0.3	0.96	2.01	80	3.2
146	1.163	2.253	2.057	125.537	1.7687	36	0.34	0.84	3.59	105.882	2.47059
144	1.552	1.778	1.07	92.7835	0.689433	44	0.44	0.79	4.2	100	1.79545
223	6.532	9.029	6.347	34.1396	0.971678	42	0.24	0.87	4.5	175	3.625
247	3.677	2.207	1.508	67.1743	0.410117	37	0.46	0.88	1.46	80.4348	1.91304
166	1.539	0.457	0.336	107.862	0.218324	49	0.48	0.76	0.52	102.083	1.58333
92.734	1.691	0.973	4.669	54.8397	2.76109	24	0.3	0.71	0.19	80	2.36667
61.073	1.212	0.944	1.308	50.3903	1.07921	26	0.42	0.7	0.23	61.9048	1.66667
99.611	1.599	1.985	0.423	62.2958	0.26454	25	0.28	0.78	0.53	89.2857	2.78571
1621	3.876	3.266	53.215	418.215	13.7294	28	0.31	0.83	5.74	90.3226	2.67742
1413	1.348	17.763	46.756	1048.22	34.6855	37	0.18	0.82	5.6	205.556	4.55556
1017	1.169	11.348	26.237	869.974	22.444	38	0.18	0.81	5.75	211.111	4.5
461	2.605	6.037	7.013	176.967	2.69213	42	0.28	0.84	7.58	150	3
197	1.597	1.878	2.983	123.356	1.86788	85	0.52	0.86	8.84	163.462	1.65385
306	0.624	1.174	4.617	490.385	7.39904	69	0.47	0.92	9.22	146.809	1.95745
32.175	1.802	0.938	1.076	17.8552	0.597114	68	0.5	0.96	8.98	136	1.92
11.325	0.181	0.553	0.073	62.5691	0.403315	68	0.51	0.94	6.92	133.333	1.84314
1843	0.715	4.303	59.497	2577.62	83.2126	21	0.45	0.96	3.33	46.6667	2.13333
20.189	0.261	0.813	0.292	77.3525	1.11877	18	0.45	0.87	1.37	0	0
596	0.824	2.663	8.81	723.301	10.6917	60	0.53	1.03	1.61	113.208	1.9434
97.622	1.874	1.256	1.57	52.0928	0.83778	19	0.39	1.42	6.25	48.7179	3.64103
159	1.764	0.757	0.956	90.1361	0.54195	36	0.34	0.84	1.36	105.882	2.47059
22.874	2.464	0.738	0.058	9.28328	0.023539	26	0.63	0.94	0.55	41.2698	1.49206
62.826	3.599	0.535	0.309	17.4565	0.0858572	57	4.53	1.2	7.78	12.5828	0.264901
8.581	1.582	0.563	0.099	5.42415	0.062579	102	0.33	0.88	12.4	309.091	2.66667
772	1.352	2.687	14.877	571.006	11.0037	105	16	1.45	6.94	6.5625	0.090625
77.613	2.302	0.651	2.791	33.7155	1.21242	108	12.8	1.73	5.53	8.4375	0.135156
1359	6.293	5.545	25.652	215.954	4.07628	105	0.34	1.03	0.41	308.824	3.02941
1542	8.599	5.95	33.045	179.323	3.84289	98	0.35	1.01	1.27	280	2.88571
1043	3.616	5.624	21.161	288.44	5.85205	115	16.6	1.77	7.82	6.92771	0.106627
1277	3.85	5.294	10.374	331.688	2.69455	91	12.2	1.47	8.98	7.45902	0.120492
2353	1.966	1.665	1.014	1196.85	0.515768	21	0.39	0.86	1.94	53.8462	2.20513
224	2.47	0.735	0.438	90.6883	0.177328	89	0.34	1.08	5.56	261.765	3.17647
768	2.809	1.902	4.199	273.407	1.49484	43	2.65	1.06	0.5	16.2264	0.4
139	2.247	0.51	0.325	61.8603	0.144637	11	0.3	1.12	2.91	36.6667	3.73333
674	13.667	3.808	12.917	49.3159	0.945123	43	4.37	1.61	1.9	9.83982	0.368421
452	2.641	3.338	5.214	171.147	1.97425	55	0.37	1.1	0.31	148.649	2.97297
909	6.763	5.192	32.136	134.408	4.75174	57	0.36	0.96	1.02	158.333	2.66667
164	1.068	3.385	0.732	153.558	0.685393	101	14.1	1.76	5.2	7.16312	0.124823
2254	4.631	13.535	66.271	486.72	14.3103	105	15.2	1.54	4.3	6.90789	0.101316
241	0.731	2.724	4.541	329.685	6.21204	110	12.3	1.54	4.51	8.94309	0.125203
843	0.643	8.989	25.816	1311.04	40.1493	0	0.99	1.26	0.56	0	1.27273
220	0.732	4.318	3.779	300.546	5.16257	86	14	1.48	4.53	6.14286	0.105714
1721	7.231	9.809	12.36	238.003	1.70931	0	0.42	1.01	0.79	0	2.40476
2321	10.711	18.403	29.528	216.693	2.75679	26	0.17	0.9	1.12	152.941	5.29412
2247	5.26	5.508	20.519	427.186	3.90095	45	0.23	0.97	5.66	195.652	4.21739
3545	4.469	23.148	124	793.242	27.7467	14	0.2	0.96	0.27	70	4.8
3579	2.059	17.818	114	1738.22	55.3667		0.48	0.88	1.56	0	1.83333
3064	1.922	19.126	108	1594.17	56.1915		0.42	1.05	1.69	0	2.5
1604	0.955	8.103	52.676	1679.58	55.1581	11	0.24	1.02	0.25	45.8333	4.25
1929	0.737	9.268	64.43	2617.37	87.422	10	0.21	1.13	1.31	47.619	5.38095
613	0.835	3.352	13.726	734.132	16.4383	51	16.6	1.82	2.03	3.07229	0.109639
1275	6.613	3.322	8.979	192.802	1.35778	53	11.8	1.59	1.64	4.49153	0.134746
256	0.51	1.235	3.208	501.961	6.2902	93	16.8	1.65	2.93	5.53571	0.0982143
569	1.969	2.999	16.501	288.979	8.3804	48	0.37	0.89	1.35	129.73	2.40541
200	2.037	4.833	2.133	98.1836	1.04713	53	0.36	0.98	1.8	147.222	2.72222
1191	12.883	6.248	16.199	92.4474	1.25739	45	9.8	1.55	0.94	4.59184	0.158163
483	1.448	5.484	4.811	333.564	3.32251	55	7.84	1.5	1.22	7.01531	0.191327
306	2.235	3.677	3.253	136.913	1.45548	33	8.54	1.56	1.18	3.86417	0.18267
944	5.493	4.853	7.131	171.855	1.2982	33	7.71	1.46	0.69	4.28016	0.189364
536	9.103	8.649	16.011	58.8817	1.75887	39	8.02	1.44	1.37	4.86284	0.179551
517	3.766	3.722	10.109	137.281	2.68428	18	0.38	1.07	1.58	47.3684	2.81579
48.049	1.05	1.778	0.37	45.761	0.352381	54	0.23	0.85	2.48	234.783	3.69565
99.008	25.464	0.872	0.568	3.88816	0.022306	45	0.23	0.92	1.88	195.652	4
139	30.42	0.809	1.786	4.56936	0.0587114	40	8.58	1.51	3.92	4.662	0.175991
253	2.92	1.484	6.279	86.6438	2.15034	41	0.29	1.08	3.85	141.379	3.72414
898	2.786	4.494	44.767	322.326	16.0686	36	0.32	1.03	0.46	112.5	3.21875
373	10.715	4.342	17.935	34.811	1.67382	17	0.3	1.39	1.78	56.6667	4.63333
142	4.207	3.134	2.042	33.7533	0.485382	20	0.3	1.27		66.6667	4.23333
83.786	3.353	1.063	0.674	24.9884	0.201014	15	0.3	1.27	3.48	50	4.23333
832	5.692	7.114	22.512	146.17	3.95502	19	0.3	1.46		63.3333	4.86667
1453	4.72	21.093	39.457	307.839	8.35953	63	1.5	1.44	3.38	42	0.96
472	1.527	8.775	5.793	309.103	3.79371	64	0.3	1.41	1.82	213.333	4.7
1716	11.093	16.5	27.312	154.692	2.46209	34	1.37	2.23	5.53	24.8175	1.62774
61.237	1.405	2.676	0.297	43.5851	0.211388	46	0.68	1.55	3.52	67.6471	2.27941
99.974	1.411	3.866	0.959	70.8533	0.67966	82	0.3	1.23	2.86	273.333	4.1
289	0.977	3.792	9.054	295.803	9.26714	21	0.53	1.22	1.45	39.6226	2.30189
570	3.195	5.79	7.775	178.404	2.43349	111	0.3	1.75	16.4	370	5.83333
139	1.137	2.891	1.893	122.252	1.66491	161	0.3	1.72	11.7	536.667	5.73333
221	1.02	2.289	0.67	216.667	0.656863	74	0.3	1.05	0.41	246.667	3.5
245	0.683	2.234	4.579	358.712	6.70425	58	1.38	0.92	1.27	42.029	0.666667
117	1.187	0.776	1.794	98.5678	1.51137	20	0.3	1.04	1.5	66.6667	3.46667
14.592	0.967	1.013	0.056	15.09	0.0579111	24	0.3	0.88	1.67	80	2.93333
239	3.62	6.343	6.299	66.0221	1.74006	45	0.3	1.24	0.35	150	4.13333
119	3.621	1.344	0.684	32.8638	0.188898	16	0.3	1.1	2.69	53.3333	3.66667
165	1.17	3.919	3.618	141.026	3.09231	91	10.9	1.83	8.8	8.34862	0.16789
719	3.261	5.532	21.429	220.485	6.5713	60	8.27	1.67	11.8	7.25514	0.201935
64.682	6.412	0.754	0.2	10.0876	0.0311915	89	8.97	1.29	3.1	9.92196	0.143813
154	2.182	0.803	0.441	70.5775	0.202108	100	10.5	1.99	5.7	9.52381	0.189524
80.14	0.911	0.747	1.038	87.9693	1.13941	96	11.2	1.75	3.5	8.57143	0.15625
30.847	0.991	0.637	0.255	31.1271	0.257316	77	10.3	1.72	6.3	7.47573	0.16699
3312	2.279	6.416	101	1453.27	44.3177	85	1.07	1.72	6.3	79.4393	1.60748
234	2.969	1.23	8.775	78.8144	2.95554	66	1.61	1.67	6.9	40.9938	1.03727
210	2.507	1.604	5.649	83.7655	2.25329	32	1.14	1.77	5.3	28.0702	1.55263
84.692	1.697	1.798	0.759	49.9069	0.44726	42	1.61	1.67	8.9	26.087	1.03727
2244	1.175	3.572	27.848	1909.79	23.7004	63	2.93	1.72	6.2	21.5017	0.587031
74.516	2.537	1.438	0.906	29.3717	0.357115	90	1.31	1.46	10.7	68.7023	1.1145
184	1.962	1.2	0.745	93.7819	0.379715	96	1.39	2.27	3.7	69.0647	1.63309
61.155	1.033	1.138	0.247	59.2014	0.239109	45	0.78	1.39	2.6	57.6923	1.78205
81.522	2.138	0.98	0.24	38.13	0.112254	17	0.53	1.45	3.2	32.0755	2.73585
418	11.754	7.081	5.879	35.5624	0.50017	79	10	1.83	16.6	7.9	0.183
86.151	11.426	2.461	0.397	7.53991	0.0347453	4.59	10	0.67	0.37	0	0
81.375	13.602	0.803	0.537	5.98258	0.0394795	49	0.56	0.86	6	87.5	1.53571
65.595	4.529	0.545	0.574	14.4833	0.126739	67	1.07	0.45	9.89	62.6168	0.420561
114	12.979	0.73	3.392	8.78342	0.261345	65	1.65	1	1.99	39.3939	0.606061
57.499	6.779	0.582	3.498	8.48193	0.516005	52	0.44	1	0.59	118.182	2.27273
597	0.832	3.464	4.735	717.548	5.69111	41	1.31	1.25	0.37	31.2977	0.954198
341	1.445	8.004	4.524	235.986	3.1308	45	1	1.33	1.53	45	1.33
651	3.078	11.814	15.951	211.501	5.18226	53	0.75	1.13	0.48	70.6667	1.50667
82.64	0.263	1.086	0.258	314.221	0.980989	28	0.85	1.38	2.7	32.9412	1.62353
42.842	0.206	1.521	0.597	207.971	2.89806	34	1.28	1.47	2.39	26.5625	1.14844
159	0.265	1.722	1.459	600	5.50566	30	1.21	1.29	1.16	24.7934	1.06612
1400	2.202	3.281	7.369	635.786	3.3465	19	0.68	1.02	0.6	27.9412	1.5
629	1.203	3.114	8.362	522.86	6.95096	53	0.33	0.88	0.98	160.606	2.66667
253	0.418	1.965	3.078	605.263	7.36364	43	0.6	0.91	0.91	71.6667	1.51667
269	0.269	2.237	4.606	1000	17.1227	43	0.89	0.93	0.94	48.3146	1.04494
144	1.249	0.985	5.662	115.292	4.53323	34	0.41	0.34	0	82.9268	0.829268
966	0.543	6.036	23.66	1779.01	43.5727	8.9	0.27	0.33	1.86	32.963	1.22222
2450	12.783	4.845	12.835	191.661	1.00407	45	0.77	0.33	1.96	58.4416	0.428571
2788	19.101	5.007	26.09	145.961	1.3659	33	0.52	0.81	2.21	63.4615	1.55769
76.998	1.868	0.588	0.555	41.2195	0.297109	54	0.77	1.01	3.31	70.1299	1.31169
53.787	4.105	0.465	0.162	13.1028	0.0394641	49	0.67	0.84	0.62	73.1343	1.25373
27.226	2.28	0.538	0.29	11.9412	0.127193	38	0.83	1	2.64	45.7831	1.20482
450	1.859	2.398	10.01	242.066	5.38462	104	1.33	1.09	3.04	78.1955	0.819549
77.574	2.429	0.538	2.613	31.9366	1.07575	90	1.04	1.15	2.04	86.5385	1.10577
90.133	2.172	0.48	2.16	41.4977	0.994475	91	1.49	0.97	3.82	61.0738	0.651007
255	2.8	1.656	1.008	91.0714	0.36	30	0.38	0.7	1.93	78.9474	1.84211
235	2.328	0.897	2.838	100.945	1.21907	33	1.18	1.45	0.58	27.9661	1.22881
168	0.801	1.557	0.206	209.738	0.257179	40	1.71	1.81	2.01	23.3918	1.05848
1015	6.89	9.166	14.266	147.315	2.07054	32	2.82	1.78	1.99	11.3475	0.631206
258	0.774	4.984	3.449	333.333	4.45607	114	9.4	2.19	7.26	12.1277	0.232979
1581	13.27	18.344	12.593	119.141	0.948983	121	0.86	1.87	22.2	140.698	2.17442
613	2.722	5.029	8.616	225.202	3.16532	61	1.85	1.66	16.7	32.973	0.897297
1254	22.285	8.041	12.872	56.271	0.577608	76	2.26	1.95	12.9	33.6283	0.862832
365	7.38	4.049	3.024	49.458	0.409756	79	1.91	2.11	12.8	41.3613	1.10471
896	16.711	4.15	10.242	53.6174	0.61289	71	1.96	1.99	9.98	36.2245	1.01531
379	6.096	3.244	13.534	62.1719	2.22014	121	10.6	2.09	15.8	11.4151	0.19717
382	6.327	3.603	14.584	60.3762	2.30504	91	14.7	2.35	8.32	6.19048	0.159864
126	1.007	1.638	2.628	125.124	2.60973	64	1.29	1.53	2.78	49.6124	1.18605
60.598	1.6	5.668	0.916	37.8737	0.5725	41	1	1.36	0.64	41	1.36
511	1.533	7.134	8.663	333.333	5.65101	39	0.46	1.33	1.17	84.7826	2.8913
291	9.7	4.35	2.381	30	0.245464	48	0.32	1.23	3.37	150	3.84375
2376	22.471	6.448	8.178	105.736	0.363936	0	0.52	1.16	0.95	0	2.23077
34.181	0.821	1.22	0.055	41.6334	0.0669915	32	0.32	0.81	0	100	2.53125
Rusk et al.,2008						54	0.91	0	0	59.3407	0
Al	Ti	Li	Ge	Al/Ti	Ge/Ti	36	0.29	0.76	0.55	124.138	2.62069
35.5	4.9	10.7	0.92	7.2449	0.187755	105	9.91	1.9	2.48	10.5954	0.191726
37.3	4.4	11	0.94	8.47727	0.213636	118	11.9	2.66	3.01	9.91597	0.223529
34.6	2.6	9	0.75	13.3077	0.288462	118	12.4	2.4	2.67	9.51613	0.193548
30	3.5	10.3	0.9	8.57143	0.257143	98	10.7	2.16	3.41	9.15888	0.201869
34.8	10	8.4	0.65	3.48	0.065	32	0.94	1.73	1.58	34.0426	1.84043
34.9	9.2	9.1	0.75	3.79348	0.0815217	27	0.8	1.5	0.13	33.75	1.875
27	8.8	6.8	0.79	3.06818	0.0897727	36	1.23	1.62	0.71	29.2683	1.31707
21.5	8.5	5.5	0.99	2.52941	0	33	0.81	1.34	4.16	40.7407	1.65432
163.6	17.7	1.7	2.05	9.24294	0.115819	41	1.08	1.48	2.26	37.963	1.37037
153.6	15.2	1.6	1.96	10.1053	0.128947	38	0.99	1.6	0.88	38.3838	1.61616
124.3	15.2	6.3	2.17	8.17763	0.142763	0	0.28	1.13	1.02	0	4.03571
47.4	14	4.6	2.12	3.38571	0.151429	78	0.23	1.22	0.4	339.13	5.30435
45.6	3.2	12.5	1.27	14.25	0.396875	80	0.28	1.2	1.5	285.714	4.28571
40.4	4.5	11.2	1.2	8.97778	0.266667	9.5	1.26	0.87	0.35	7.53968	0.690476
59.9	5.7	13.4	1.18	10.5088	0.207018	87	2.04	1.2	10.3	42.6471	0.588235
56.2	4.8	14.3	1.35	11.7083	0.28125	106	1.83	1.05	17.9	57.9235	0.57377
45.1	5.7	10.4	1.26	7.91228	0.221053	93	0.89	0.98	8.52	104.494	1.10112
52.8	4.7	12.9	1.05	11.234	0.223404	131	2.61	1.36	0.97	50.1916	0.521073
36.1	3.2	11.1	1.25	11.2812	0.390625	104	2.49	1.35	2.48	41.7671	0.542169
56.8	2.7	13.3	1.29	21.037	0.477778	52	1.66	1.02	0.27	31.3253	0.614458
41.7	7.7	8.3	1.75	5.41558	0.227273	65	1.46	1.07	0.1	44.5205	0.732877
37.5	4.1	0.4	2.23	9.14634	0.543902	75	2.64	1	2.92	28.4091	0.378788
54.4	6	11.1	1.44	9.06667	0.24	71	2.47	0.85	1.18	28.7449	0.34413
48.3	5.8	12.4	1.41	8.32759	0.243103	69	1.62	1.1	1.09	42.5926	0.679012
44.9	2.1	6.4	1.38	21.381	0.657143	86	1.58	1.36	4.12	54.4304	0.860759
50.1	2.4	5.5	1.48	20.875	0.616667	65	2.69	1.2	1.63	24.1636	0.446097
37.6	7.6	3.5	2.18	4.94737	0.286842	54	1.5	0.72	2.61	36	0.48
38.4	7	8.7	2.21	5.48571	0.315714	85	2.54	1.2	0.93	33.4646	0.472441
31.1	5.3	4.9	1.18	5.86792	0.222642	63	1.85	1.17	0.03	34.0541	0.632432
38.7	6.1	2	1.19	6.34426	0.195082	57	1.35	0.5	0.18	42.2222	0.37037
36.3	6.1	10.4	1.21	5.95082	0.198361	56	3.48	0.58	3.09	16.092	0.166667
42.3	7.6	10	1.25	5.56579	0.164474	62	3.31	0.81	0	18.7311	0.244713
34.5	3.8	9.3	1.37	9.07895	0.360526	67	3.17	0.81	2.94	21.1356	0.255521
38.8	3.3	10.6	1.61	11.7576	0.487879	96	1.37	1.1	0.25	70.073	0.80292
34.9	3.6	11	1.31	9.69444	0.363889	106	2.47	0.74	2.28	42.915	0.299595
35.5	3.8	11.2	1.42	9.34211	0.373684	97	2.55	0.8	0	38.0392	0.313725
39.5	3.3	9.8	1.18	11.9697	0.357576	92	2.43	0.8	0.9	37.8601	0.329218
33.7	2.5	10.4	1.13	13.48	0.452	75	1.43	1.08	1.66	52.4476	0.755245
48.3	4.9	13	1.72	9.85714	0.35102	88	1.37	0.97	1.03	64.2336	0.708029
44.9	5.6	11.9	1.72	8.01786	0.307143
36.9	3.2	3.1	1.77	11.5312	0.553125
43.5	3.5	8.8	1.74	12.4286	0.497143
35.3	5.5	7.1	1.78	6.41818	0.323636
33.1	5.1	7	1.84	6.4902	0.360784
42.8	2.9	7.1	0.91	14.7586	0.313793
47.5	2.2	8.2	0.81	21.5909	0.368182
28	4.8	7.1	1.89	5.83333	0.39375
36.1	7.7	6.7	2.12	4.68831	0.275325
48.5	5.5	5.5	1.72	8.81818	0.312727
41	3.9	5.5	1.89	10.5128	0.484615
47.2	4	7	1.88	11.8	0.47
42.8	3.7	6.5	1.85	11.5676	0.5
44.4	7.2	5.5	1.99	6.16667	0.276389
42.4	6.2	5.4	1.4	6.83871	0.225806
46.5	3.1	8.2	1.69	15	0.545161
48.1	3	7.8	1.8	16.0333	0.6
62.3	5.3	8.1	1.68	11.7547	0.316981
59.5	6	8.4	1.73	9.91667	0.288333
64.6	8.8	11	1.8	7.34091	0.204545
55.7	7.3	7.7	1.66	7.63014	0.227397
57.2	5.1	9.8	1.9	11.2157	0.372549
39.2	8.4	6.7	1.76	4.66667	0.209524
41.4	7	6.8	1.79	5.91429	0.255714
42.6	3.3	6.9	1.87	12.9091	0.566667
46.2	2.7	8.3	1.81	17.1111	0.67037
17.3	3	5.1	2.29	5.76667	0.763333
43.6	4.9	9.5	2.54	8.89796	0.518367
45.7	5.1	8.5	2.12	8.96078	0.415686
43.7	5.3	9.3	2.25	8.24528	0.424528
33.8	4.6	9	2.19	7.34783	0.476087
44	3.3	11.4	2.74	13.3333	0.830303
32.4	2.2	6.3	2.91	14.7273	1.32273
40.4	6.7	10.3	1.42	6.02985	0.21194
57.5	7.7	9.6	1.58	7.46753	0.205195
44.4	6.7	3.7	1.78	6.62687	0.265672
43.9	7.7	5.5	1.65	5.7013	0.214286
24.6	5.3	9.9	1.31	4.64151	0.24717
41.1	6.1	12.4	1.43	6.7377	0.234426
40.6	6.5	7.8	0.96	6.24615	0.147692
35.8	10.7	6.1	1.08	3.34579	0.100935
41.2	6.6	8.9	1.59	6.24242	0.240909
46.3	7.2	8.4	1.6	6.43056	0.222222
36.7	8.1	7	0.9	4.53086	0.111111
51.6	7.5	6.3	1.08	6.88	0.144
42.7	10.6	8.6	0.66	4.0283	0.0622642
40.4	8.1	8.1	0.69	4.98765	0.0851852
31.9	7.7	6.4	0.79	4.14286	0.102597
34.5	8.4	7.3	0.71	4.10714	0.0845238
35.3	8.3	7.4	0.84	4.25301	0.101205
29.3	6.8	6.3	0.87	4.30882	0.127941
33.4	7.2	7.4	0.85	4.63889	0.118056
35.2	6.8	7.1	0.9	5.17647	0.132353
51.3	8.2	8.5	0.92	6.2561	0.112195
35.4	7.6	8.1	0.84	4.65789	0.110526
23.3	7.9	3.1	1.11	2.94937	0.140506
34.2	9.4	6.5	0.85	3.6383	0.0904255
33.5	6.4	3.9	1.05	5.23438	0.164062
38.9	9.2	0.5	1.47	4.22826	0.159783
31.5	11.6	7.4	1.35	2.71552	0.116379
40.5	6.8	4.4	2.7	5.95588	0.397059
30	7.3	4.1	1.44	4.10959	0.19726
28.9	8.1	6.8	1.31	3.5679	0.161728
39.8	10.8	4.7	1.34	3.68519	0.124074
15.3	0.8	1	1.04	19.125	1.3
22.8	10	6.5	0.94	2.28	0.094
17.3	8.5	4.6	1.09	2.03529	0.128235
44.6	10.9	2.4	1.54	4.09174	0.141284
35.5	14.6	7	1.7	2.43151	0.116438
38.5	6	10.4	1.14	6.41667	0.19
31.9	7.8	10.6	0.95	4.08974	0.121795
29.9	4	6.6	1.53	7.475	0.3825
35.4	4.8	7.1	1.52	7.375	0.316667
46.2	7.2	10.2	1.38	6.41667	0.191667
36.9	9.5	10.1	1.37	3.88421	0.144211
36.9	8.5	8.9	1.26	4.34118	0.148235
44.5	8.9	10.4	1.4	5	0.157303
38.6	5.4	4.9	0.93	7.14815	0.172222
30.1	5.6	4.2	0.85	5.375	0.151786
31.6	5.3	8.1	0.79	5.96226	0.149057
36.5	4.9	10.7	0.81	7.44898	0.165306
32.1	6.1	7.5	2.05	5.2623	0.336066
42.9	7.1	9.1	2.1	6.04225	0.295775
38.8	5.8	8.4	1.8	6.68966	0.310345
32.5	4.7	7.9	1.89	6.91489	0.402128
30.2	5.6	6.8	1.9	5.39286	0.339286
41	6.2	7.3	1.99	6.6129	0.320968
36.4	6.5	8.6	1.63	5.6	0.250769
39.4	5.9	7.6	1.76	6.67797	0.298305
29.4	5	7	1.64	5.88	0.328
32.1	6.1	6.7	1.85	5.2623	0.303279
42.1	7.3	8.8	1.6	5.76712	0.219178
29	6.9	7.5	1.54	4.2029	0.223188
31	5.2	7	1.69	5.96154	0.325
39.8	6.9	7.1	1.74	5.76812	0.252174
16	5.5	6.8	0.98	2.90909	0.178182
17.2	5.8	2.5	1.03	2.96552	0.177586
36.7	5.1	7.3	2.13	7.19608	0.417647
43.1	5.4	7.8	1.51	7.98148	0.27963
32.4	7.6	8.1	0.73	4.26316	0.0960526
34.9	7.3	8.1	1.03	4.78082	0.141096
40.3	5.3	7.2	1.41	7.60377	0.266038
49.6	5.9	7.8	1.51	8.40678	0.255932
46.4	6.5	8	1.54	7.13846	0.236923
32.5	6.2	6.4	1.6	5.24194	0.258065
27.9	7.8	8.9	1.68	3.57692	0.215385
41.8	7	10.1	1.75	5.97143	0.25
47.7	2.5	7	1.61	19.08	0.644
50	6.7	3.6	1.96	7.46269	0.292537
48.2	4.8	7	1.63	10.0417	0.339583
41.5	3.5	6.3	1.77	11.8571	0.505714
51.3	7.7	5.2	1.5	6.66234	0.194805
42.5	7.4	6	1.41	5.74324	0.190541
32.6	0.7	5.4	1.86	46.5714	2.65714
35.8	0.8	7	1.83	44.75	2.2875
34.7	0.9	3.3	1.6	38.5556	1.77778
21.3	0.1	3	1.83	213	18.3
41.5	17.4	5.6	2.52	2.38506	0.144828
39.8	15.2	4.2	3.03	2.61842	0.199342
25.9	29.9	0.4	2.4	0.866221	0.0802676
26.5	28.1	0.2	2.45	0.94306	0.0871886
9.6	23.8	3.2	0.84	0.403361	0.0352941
14.9	22.7	1.7	0.84	0.656388	0.0370044
71.3	36.6	7.2	0.95	1.94809	0.0259563
97.4	33.8	7.3	0.82	2.88166	0.0242604
18.1	19.1	2.1	0.64	0.947644	0.0335079
32.9	30.8	4.4	0.81	1.06818	0.0262987
29.9	25.2	2.9	0.89	1.18651	0.0353175
18.3	30.1	3	0.65	0.607973	0.0215947
24.2	33.2	4.2	0.64	0.728916	0.0192771
22.7	30.2	5	0.79	0.751656	0.0261589
36.8	15.1	3.4	1.37	2.43709	0.0907285
59.6	17.2	3.1	1.56	3.46512	0.0906977
37.6	15.7	7.5	1.07	2.3949	0.0681529
44.7	15.4	8.2	1.1	2.9026	0.0714286
27.8	15.4	2.8	2.44	1.80519	0.158442
38	21.1	6.9	1.61	1.80095	0.0763033
105.4	18.3	4.1	1	5.75956	0.0546448
95.1	21.7	3.4	1.11	4.38249	0.0511521
77.6	22.2	4.4	0.75	3.4955	0.0337838
61.7	24.9	4.8	0.83	2.47791	0.0333333
26.4	25.6	4.1	0.78	1.03125	0.0304687
23.6	28.1	4.1	0.89	0.839858	0.0316726
